# Supplementary material for: One-step synthesis of magnetically recyclable Co@BN core–shell nanocatalysts for catalytic reduction of nitroarenes
Source: Royal Society of Chemistry journal article supplement (doi:10.1039/c7ra04907b), 2017-01-01
Supplement: c7ra04907b1.pdf [file c7ra04907b1.pdf]

## **One-step synthesis of magnetically recyclable Co@BN core-shell nanocatalysts for catalytic reduction of nitroarenes**

*Man Du,<sup>†</sup> Qiuwen Liu,<sup>†</sup> Caijin Huang<sup>\*,†</sup> and Xiaoqing Qiu<sup>\*,‡</sup>*

<sup>†</sup>State Key Laboratory of Photocatalysis on Energy and Environment, College of Chemistry, Fuzhou University, Fuzhou 350002, P. R. China.

<sup>‡</sup>College of Chemistry and Chemical Engineering, Central south University, Changsha, 41083, China

\*To whom correspondence should be addressed.

E-mail: [cjhuang@fzu.edu.cn](mailto:cjhuang@fzu.edu.cn), [xq-qiu@csu.edu.cn](mailto:xq-qiu@csu.edu.cn)

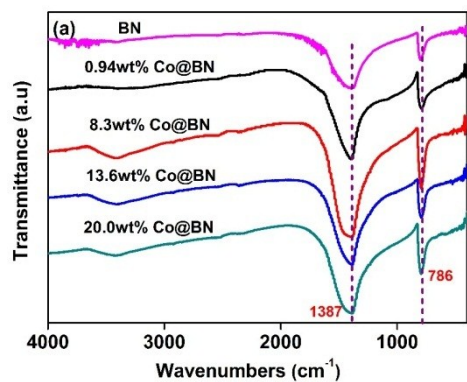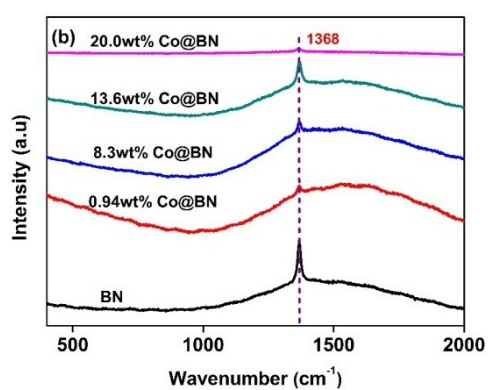

**Fig. S1** (a) FTIR and (b) Raman spectra of *h*-BN and the Co@BN samples with various Co contents.

(a)

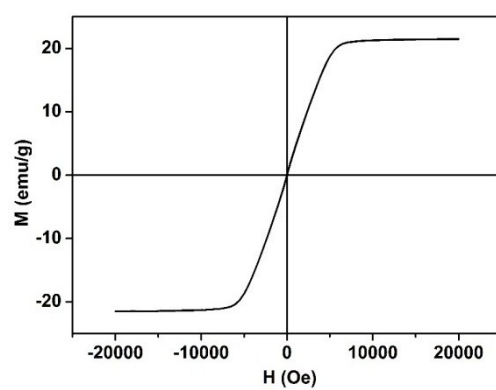

(b)

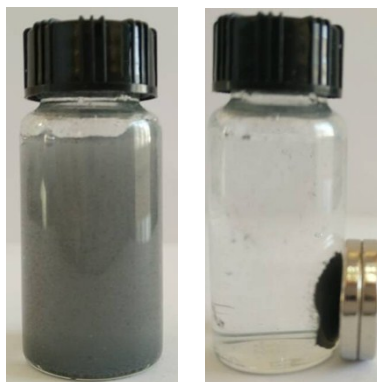

**Fig. S2.** (a) Hysteresis loops of the 13.6 wt% Co@BN nanocatalyst measured at 300 K. (b) photographs of the Co@BN dispersion before (left) and after (right) the magnetic separation.

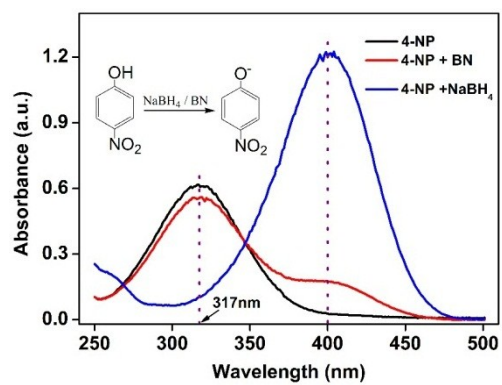

**Fig. S3.** Evolution of UV-vis spectra of the 4-NP solution added with NaBH<sub>4</sub> or *h*-BN.

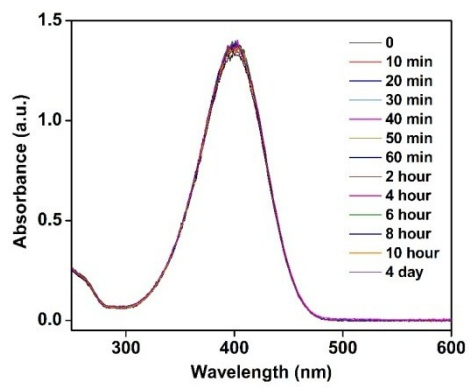

**Fig. S4.** Catalytic reduction of 4-nitrophenol in the presence of NaBH<sub>4</sub>.

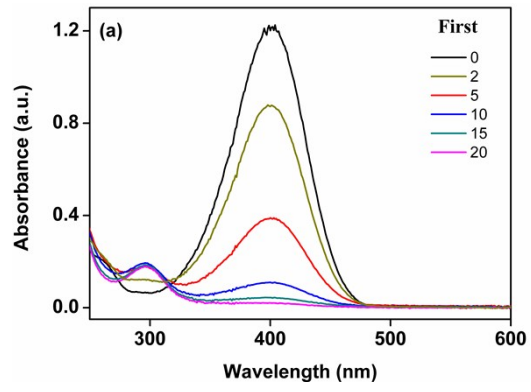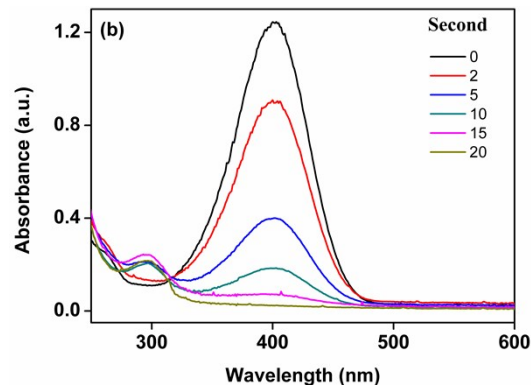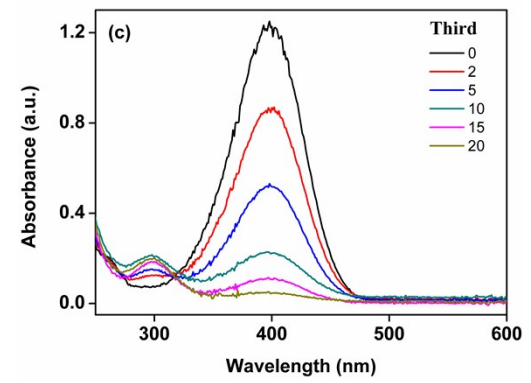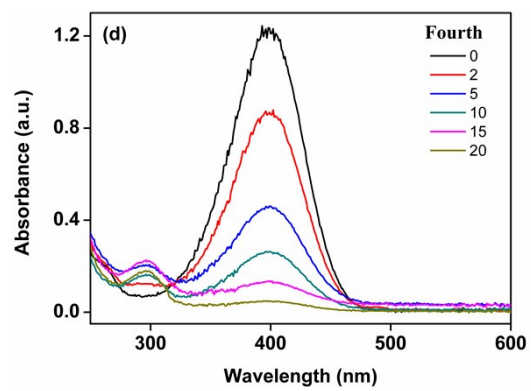

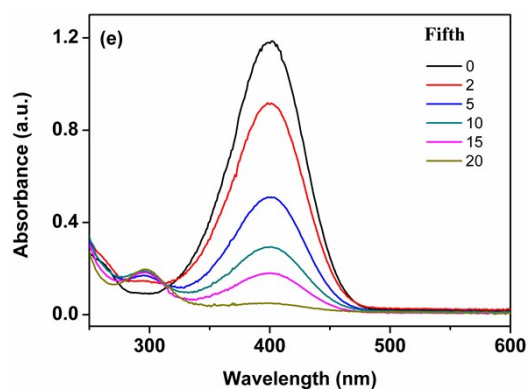

**Fig. S5.** Successive UV-vis spectra for the reduction reaction of 4-NP by NaBH<sub>4</sub> using the catalyst of 13.6 wt% Co@BN nanoparticles in each catalysis recycle.

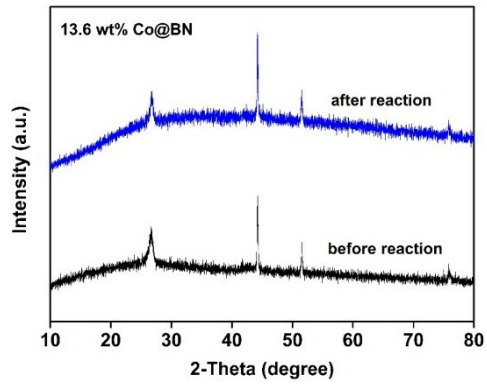

**Fig. S6.** XRD patterns of 13.6 wt% Co@BN nanoparticles before and after the reaction.



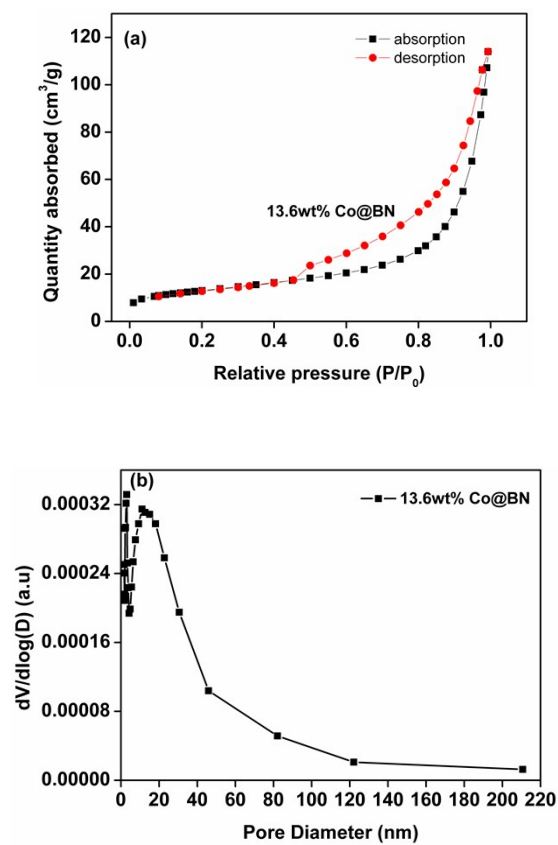

**Fig. S7.** (a)  $N_2$  adsorption–desorption isotherms and (b) the corresponding pore size distributions of 13.6 wt% Co@BN.

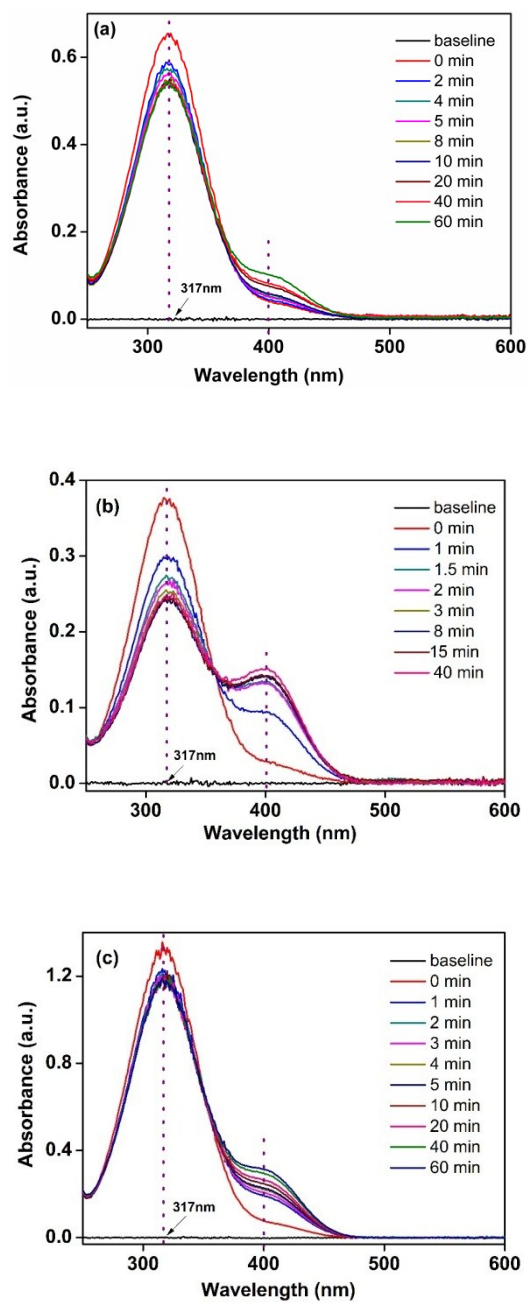

**Fig. S8.** Absorbance of 4-NP at a concentration of (a) 100 ppm, (b) 50ppm and (c) 200ppm in the presence of *h*-BN ( 10 mg).

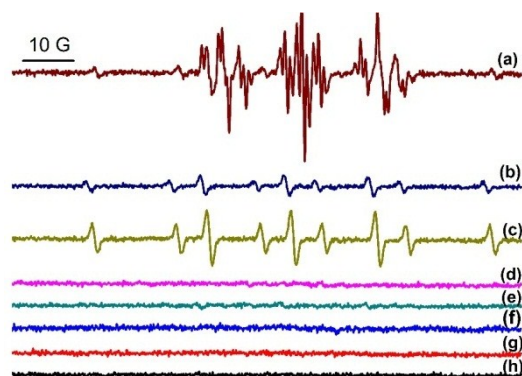

**Fig. S9.** Spin adducts formed in the presence of (a) 4-NP+NaBH<sub>4</sub>+catalyst+DMPO, (b) 4-NP+NaBH<sub>4</sub>+DMPO, (c) NaBH<sub>4</sub>+DMPO, (d) catalyst + DMPO, (e) 4-NP+DMPO, (f) catalyst, (g) NaBH<sub>4</sub> and (h) 4-NP.

**Table S1.** Reduction of 4-nitrophenol to 4-aminophenol by some cobalt-based catalysts.

| Entry | catalyst            | Yield (%)          | Con. (%) | TONs | Select. (%) <sup>a</sup> | Ref <sup>c</sup> |
|-------|---------------------|--------------------|----------|------|--------------------------|------------------|
| 1     | FeCo@N-doped C      | N. P. <sup>b</sup> | >95      | 10   | N. P.                    | 1                |
| 2     | Co@N-C 700          | N. P.              | >99      | 6    | N. P.                    | 2                |
| 3     | p(AMPS)-Co          | N. P.              | >97      | 5    | N. P.                    | 3                |
| 4     | Co@BN               | >96                | >96      | 5    | >99                      | This work        |
| 5     | Co@SiO <sub>2</sub> | N. P.              | >99      | 4    | N. P.                    | 4                |
| 6     | meso-Co-150         | N. P.              | >99      | 4    | N. P.                    | 5                |
| 7     | Co-NC               | N. P.              | >93      | 4    | N. P.                    | 6                |

<sup>a</sup> The selectivity can reach >99% because 4-aminophenol is the sole product for this model reaction.

<sup>b</sup> N. P.: Not provided.

<sup>c</sup> Refs:

1. L. Hu, R. Zhang, L. Wei, F. Zhang and Q. Chen, *Nanoscale*, 2015, **7**, 450-454.
2. Y. Yusran, D. Xu, Q. Fang, D. Zhang and S. Qiu, *Micropor. Mesopor. Mat.*, 2017, **241**, 346-354.
3. N. Sahiner, H. Ozay, O. Ozay and N. Aktas, *Appl. Catal. B: Environ.*, 2010, **101**, 137-143.
4. N. Yan, Z. Zhao, Y. Li, F. Wang, H. Zhong and Q. Chen, *Inorg. chem.*, 2014, **53**, 9073-9079.
5. B. M. Mogudi, P. Ncube and R. Meijboom, *Appl. Catal. B: Environ.*, 2016, **198**, 74-82.
6. Z. Hasan, Y. S. Ok, J. Rinklebe, Y. F. Tsang, D.-W. Cho and H. Song, *J. Alloy. Compd.*, 2017, **703**, 118-124.

**Table S2.** The load of Co on the recycled catalyst 13.6 wt% Co@BN.

| Recycle | Initial | First run | Second run | Third run | Fourth run | Fifth run |
|---------|---------|-----------|------------|-----------|------------|-----------|
| Co wt%  | 13.6    | 13.3      | 13.2       | 12.9      | 12.5       | 11.5      |
